# Supplementary material for: In Vitro Microevolution and Co-Selection Assessment of Amoxicillin and Cefotaxime Impact on Escherichia coli Resistance Development
Source: MDPI journal article supplement (doi:10.3390/antibiotics13030247), 2024-03-07
Supplement: s1 [file s1]

Supplementary Table S1: Quality data of the contigs based on the QUAST (v5.2.) software analysis.

| Strain    | No of trimmed reads | No of contigs | Coverage | N50     | N75    | L50 | L75 |
|-----------|---------------------|---------------|----------|---------|--------|-----|-----|
| 0× AMX    | 4956318             | 109           | 180.18   | 231989  | 121408 | 6   | 14  |
| 1× AMX    | 6628030             | 111           | 259.102  | 205034  | 121530 | 7   | 14  |
| 10× AMX   | 4791998             | 126           | 168.046  | 194885  | 107365 | 9   | 18  |
| 100× AMX  | 5440885             | 193           | 134.166  | 160547  | 84576  | 12  | 24  |
| 1000× AMX | 4221108             | 102           | 161.305  | 202436  | 130873 | 8   | 16  |
| 0× CTX    | 2277416             | 249           | 55.8348  | 120 956 | 65 648 | 14  | 27  |
| 1× CTX    | 2421900             | 253           | 59.5407  | 132 252 | 57 752 | 14  | 27  |
| 10× CTX   | 2444649             | 237           | 59.7927  | 155 433 | 84 590 | 12  | 24  |
| 100× CTX  | 2315672             | 260           | 56.5416  | 120 953 | 50 443 | 15  | 29  |
| 1000× CTX | 1413575             | 327           | 34.4063  | 73 430  | 29 355 | 21  | 48  |

AMX-amoxicillin, CTX-cefotaxime

Supplementary Table S2: The set of 44 ARGs identified in the next-generation sequencing was the same for all samples.

| Gene        | Coverage % | Identity % | Mechanism               | Resistance                                                                                                         |
|-------------|------------|------------|-------------------------|--------------------------------------------------------------------------------------------------------------------|
| <i>acrA</i> | 100.00     | 99.16      | antibiotic efflux       | cephalosporin, fluoroquinolone, glycylicycline, penam, phenicol, rifamycin, tetracycline and triclosan             |
| <i>acrB</i> | 100.00     | 98.64      | antibiotic efflux       |                                                                                                                    |
| <i>acrD</i> | 100.00     | 98.04      | antibiotic efflux       |                                                                                                                    |
| <i>acrE</i> | 100.00     | 98.79      | antibiotic efflux       |                                                                                                                    |
| <i>acrF</i> | 100.00     | 96.49      | antibiotic efflux       |                                                                                                                    |
| <i>acrS</i> | 100.00     | 98.34      | antibiotic efflux       | cephalosporin, cephamycin, fluoroquinolone, glycylicycline, penam, phenicol, rifamycin, tetracycline and triclosan |
| <i>ampC</i> | 100.00     | 98.15      | antibiotic inactivation | cephalosporin and penam                                                                                            |
| <i>ampH</i> | 100.00     | 97.50      | antibiotic inactivation |                                                                                                                    |
| <i>bacA</i> | 99.76      | 98.17      | target alteration       | peptide                                                                                                            |
| <i>baeR</i> | 99.86      | 96.81      | antibiotic efflux       | aminocoumarin andaminoglycoside                                                                                    |
| <i>baeS</i> | 100.00     | 90.53      | antibiotic efflux       |                                                                                                                    |
| <i>cpxA</i> | 100.00     | 98.47      | antibiotic efflux       |                                                                                                                    |
| <i>CRP</i>  | 100.00     | 99.21      | antibiotic efflux       | fluoroquinolone, macrolide and penam                                                                               |
| <i>emrA</i> | 100.00     | 98.21      | antibiotic efflux       | fluoroquinolone                                                                                                    |
| <i>emrB</i> | 100.00     | 96.95      | antibiotic efflux       |                                                                                                                    |
| <i>emrE</i> | 100.00     | 92.19      | antibiotic efflux       | macrolide                                                                                                          |
| <i>emrK</i> | 100.00     | 97.73      | antibiotic efflux       | tetracycline                                                                                                       |
| <i>emrR</i> | 100.00     | 98.68      | antibiotic efflux       | fluoroquinolone                                                                                                    |
| <i>emrY</i> | 100.00     | 97.73      | antibiotic efflux       | tetracycline                                                                                                       |
| <i>eptA</i> | 100.00     | 91.85      | target alteration       | peptide                                                                                                            |
| <i>evgA</i> | 100.00     | 99.02      | antibiotic efflux       | fluoroquinolone, macrolide, penam and tetracycline                                                                 |
| <i>evgS</i> | 100.00     | 96.19      | antibiotic efflux       |                                                                                                                    |
| <i>gadW</i> | 100.00     | 99.86      | antibiotic efflux       | fluoroquinolone, macrolide and penam                                                                               |
| <i>gadX</i> | 100.00     | 93.82      | antibiotic efflux       |                                                                                                                    |

|             |        |       |                      |                                                                                                                                                                                         |
|-------------|--------|-------|----------------------|-----------------------------------------------------------------------------------------------------------------------------------------------------------------------------------------|
| <i>H-NS</i> | 100.00 | 99.28 | antibiotic efflux    | cephalosporin, cephamycin, fluoroquinolone, macrolide, penam and tetracycline                                                                                                           |
| <i>kdpE</i> | 99.26  | 95.84 | antibiotic efflux    | aminoglycoside                                                                                                                                                                          |
| <i>marA</i> | 100.00 | 98.70 | reduced permeability | carbapenem, cephalosporin, cephamycin, fluoroquinolone, glycylcycline, monobactam, penam, penem, phenicol, rifamycin, tetracycline and triclosan                                        |
| <i>mdfA</i> | 100.00 | 96.59 | antibiotic efflux    | benzalkonium chloride, rhodamine and tetracycline                                                                                                                                       |
| <i>mdtA</i> | 100.00 | 95.11 | antibiotic efflux    | aminocoumarin                                                                                                                                                                           |
| <i>mdtB</i> | 100.00 | 96.29 | antibiotic efflux    |                                                                                                                                                                                         |
| <i>mdtC</i> | 100.00 | 94.15 | antibiotic efflux    |                                                                                                                                                                                         |
| <i>mdtE</i> | 100.00 | 98.62 | antibiotic efflux    | fluoroquinolone, macrolide and penam                                                                                                                                                    |
| <i>mdtF</i> | 100.00 | 97.33 | antibiotic efflux    |                                                                                                                                                                                         |
| <i>mdtG</i> | 100.00 | 98.21 | antibiotic efflux    |                                                                                                                                                                                         |
| <i>mdtH</i> | 100.00 | 98.26 | antibiotic efflux    | fosfomycin                                                                                                                                                                              |
| <i>mdtM</i> | 100.00 | 95.05 | antibiotic efflux    | fluoroquinolone                                                                                                                                                                         |
| <i>mdtN</i> | 100.00 | 95.64 | antibiotic efflux    | acridine dye, fluoroquinolone, lincosamide, nucleoside and phenicol                                                                                                                     |
| <i>mdtO</i> | 100.00 | 97.08 | antibiotic efflux    | acridine dye and nucleoside                                                                                                                                                             |
| <i>mdtP</i> | 100.00 | 97.61 | antibiotic efflux    |                                                                                                                                                                                         |
| <i>msbA</i> | 100.00 | 98.06 | antibiotic efflux    |                                                                                                                                                                                         |
| <i>pmrF</i> | 100.00 | 97.63 | target alteration    | nitroimidazole                                                                                                                                                                          |
| <i>tolC</i> | 100.00 | 97.98 | antibiotic efflux    | peptide                                                                                                                                                                                 |
| <i>ugd</i>  | 100.00 | 96.92 | target alteration    | aminocoumarin, aminoglycoside, carbapenem, cephalosporin, cephamycin, fluoroquinolone, glycylcycline, macrolide, penam, penem, peptide, phenicol, rifamycin, tetracycline and triclosan |
| <i>yoiI</i> | 100.00 | 98.05 | antibiotic efflux    | peptide                                                                                                                                                                                 |

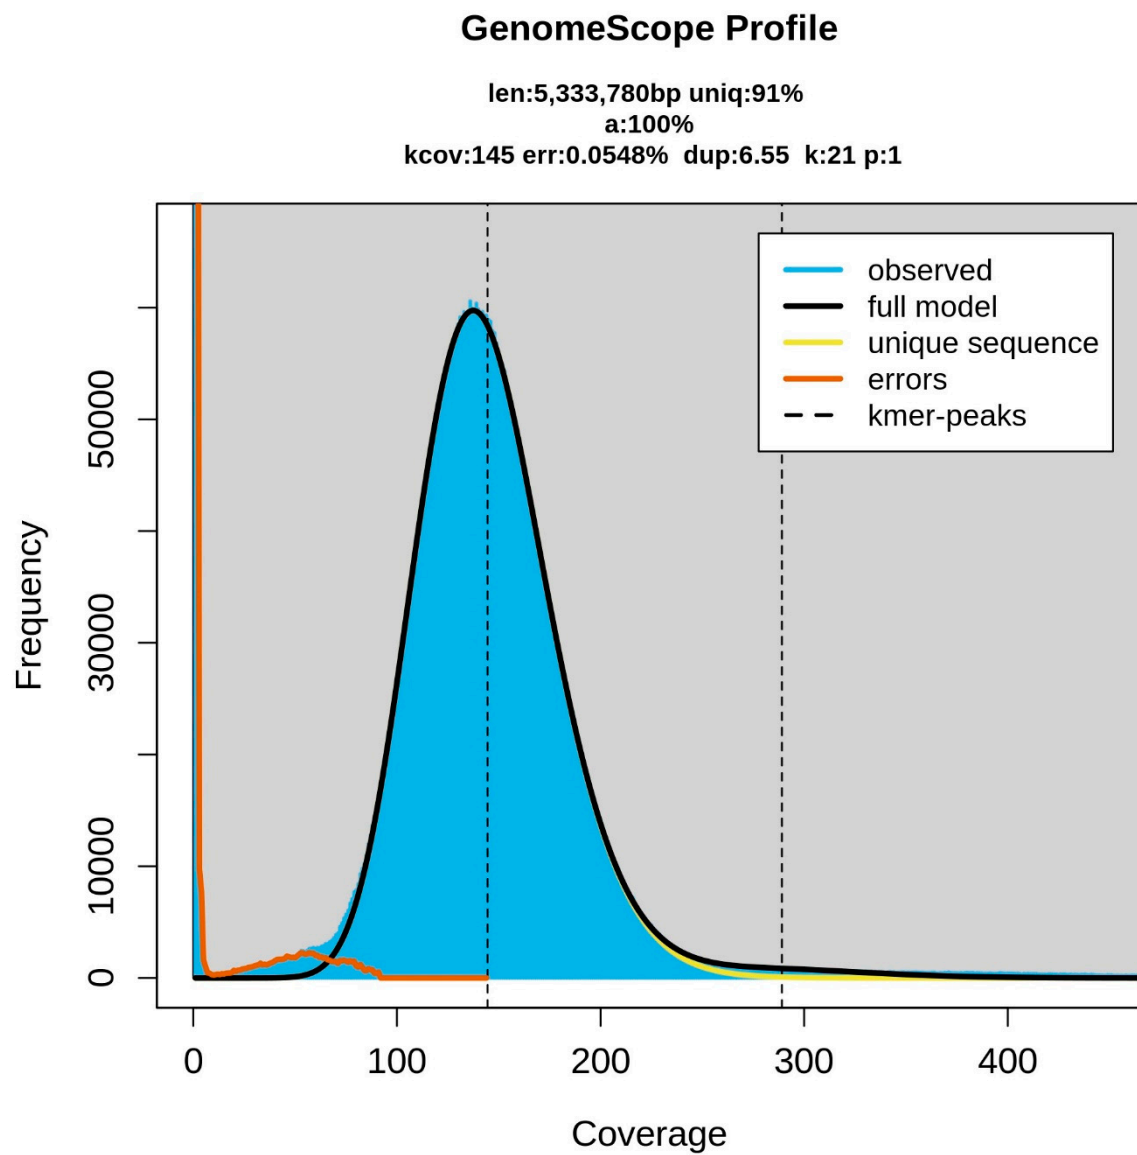

Supplementary Figure S1: GenoScope profile of 0× AMX sample. The fit of the model (black line) to the observed kmer frequencies (blue area) is shown for *E. coli* sample. The genome size, heterozygote ratio and repetitive content of unprocessed short reads can be read.

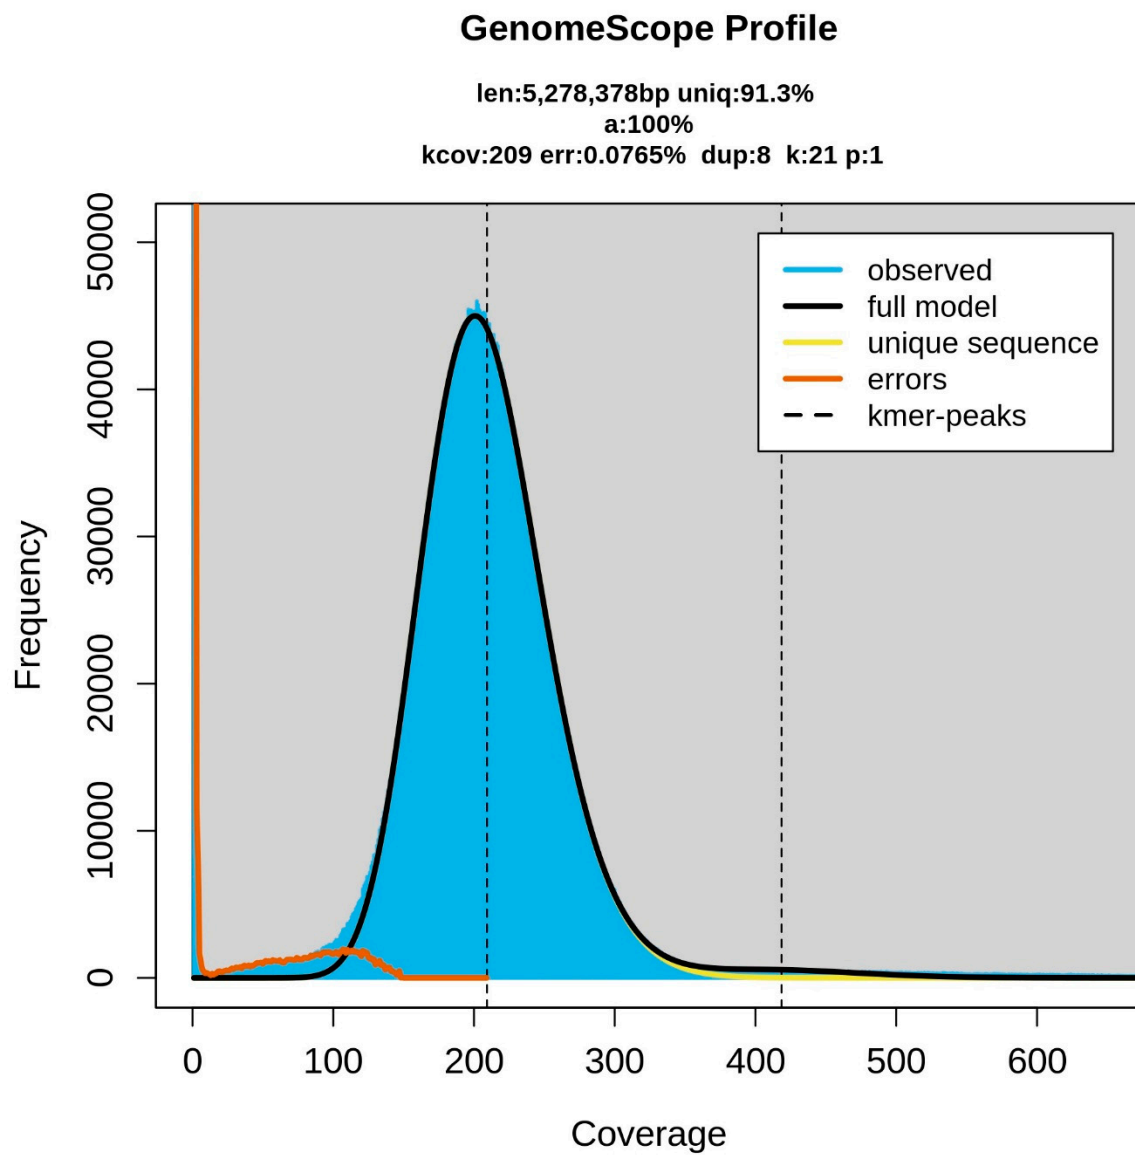

Supplementary Figure S2: GenoScope profile of 1× AMX sample. The fit of the model (black line) to the observed kmer frequencies (blue area) is shown for *E. coli* sample. The genome size, heterozygote ratio and repetitive content of unprocessed short reads can be read.

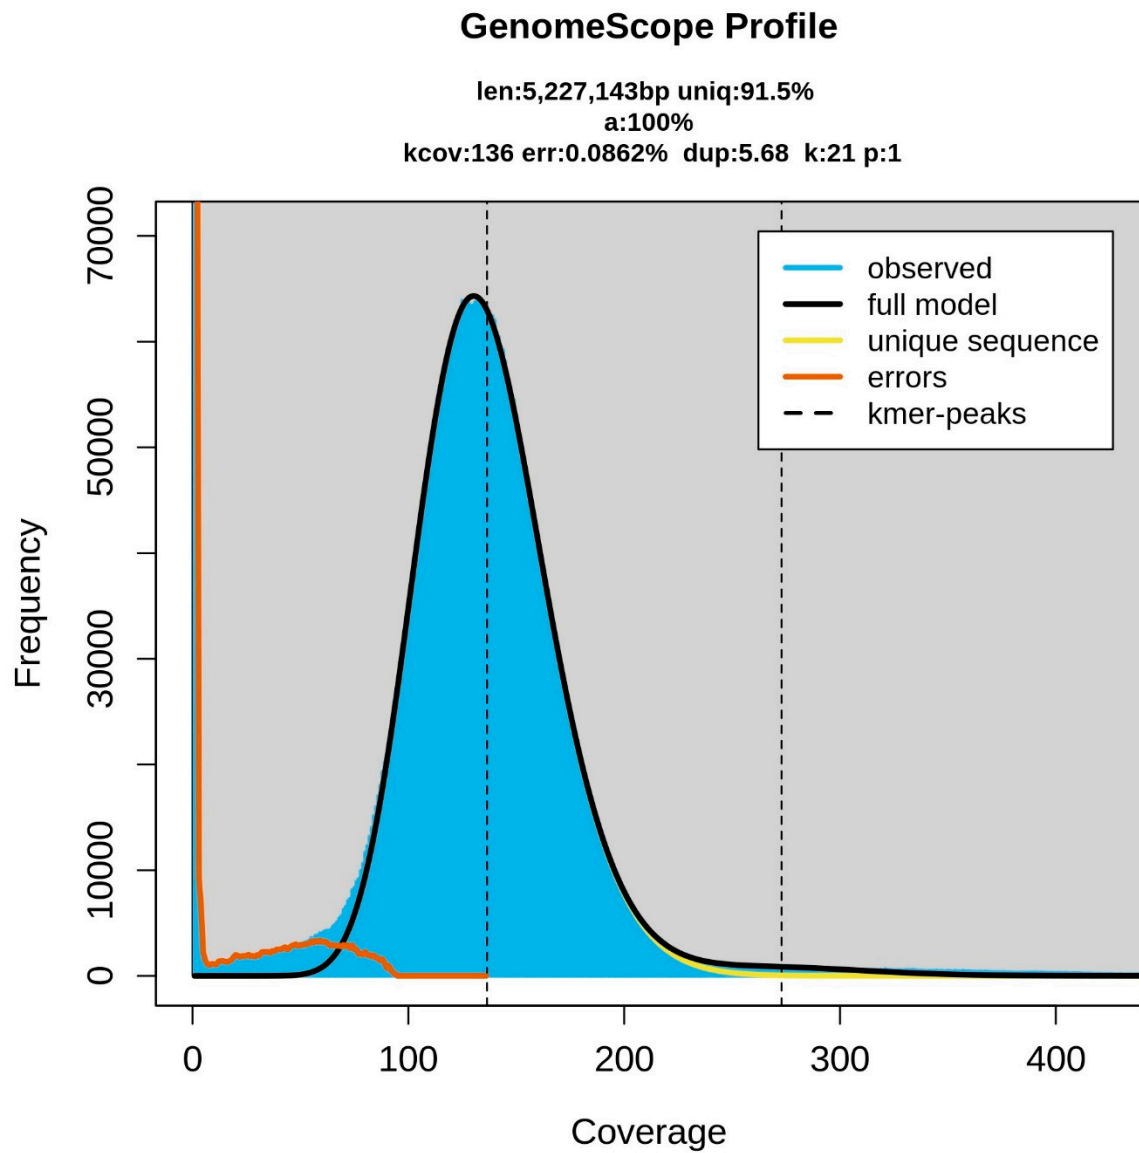

Supplementary Figure S3: GenoScope profile of 10× AMX sample. The fit of the model (black line) to the observed kmer frequencies (blue area) is shown for *E. coli* sample. The genome size, heterozygote ratio and repetitive content of unprocessed short reads can be read.

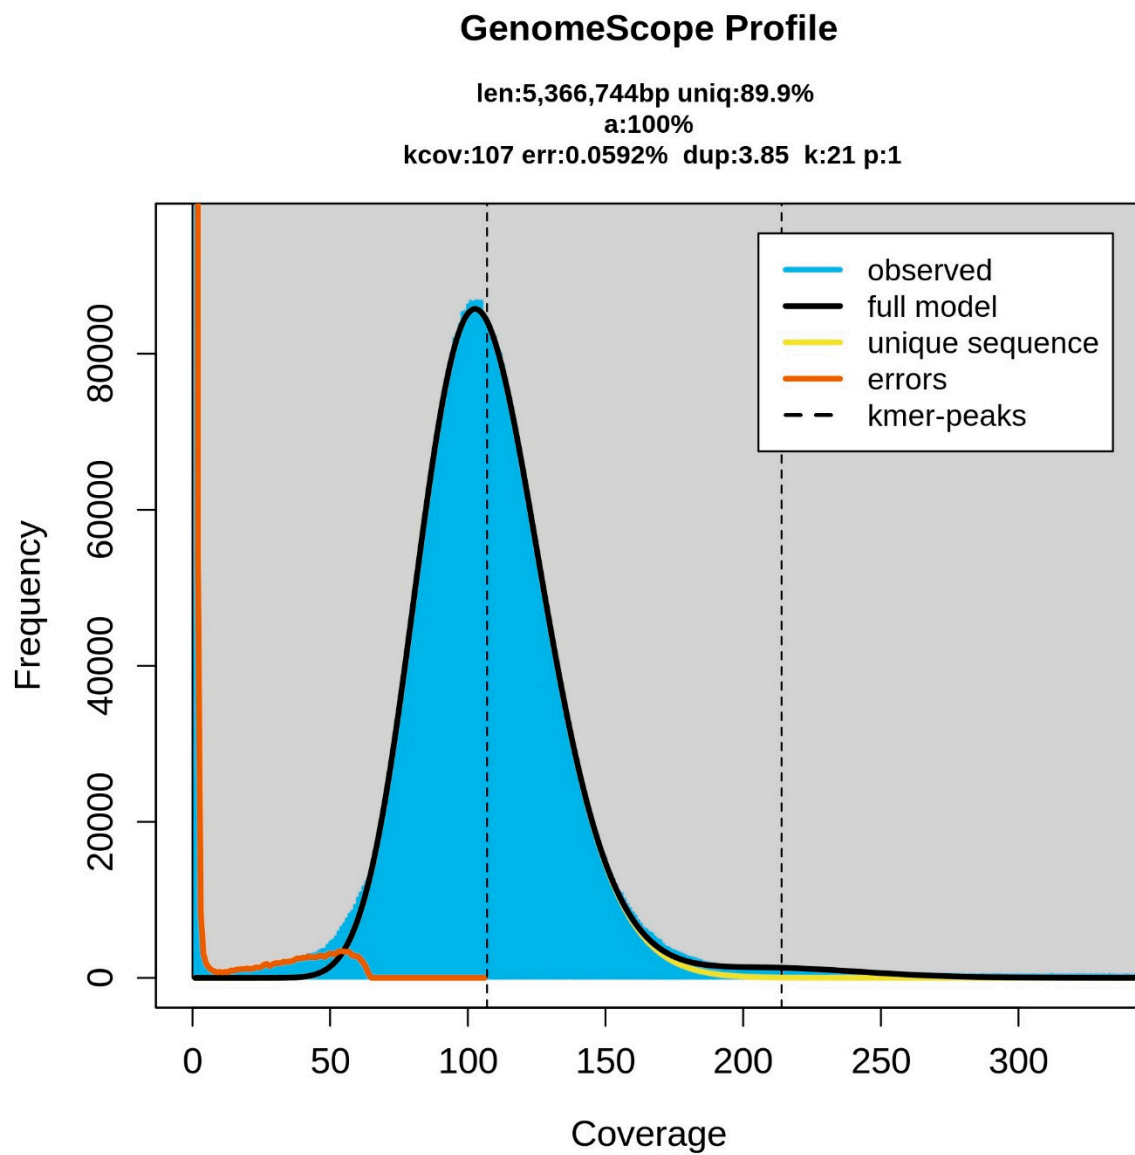

Supplementary Figure S4: GenoScope profile of 100× AMX sample. The fit of the model (black line) to the observed kmer frequencies (blue area) is shown for *E. coli* sample. The genome size, heterozygote ratio and repetitive content of unprocessed short reads can be read.

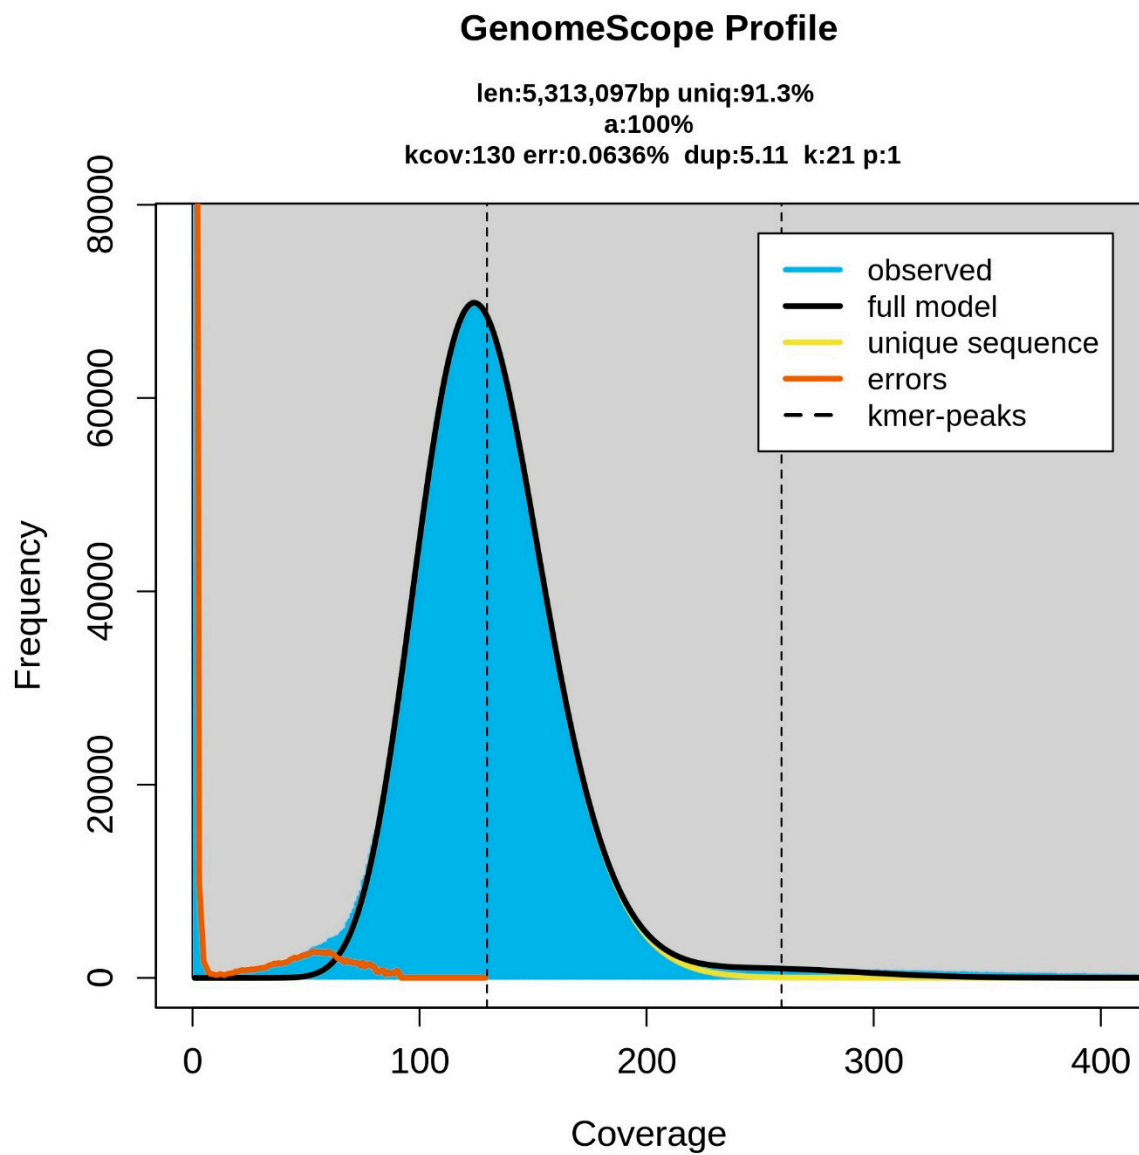

Supplementary Figure S5: GenoScope profile of 1000× AMX sample. The fit of the model (black line) to the observed kmer fre-quencies (blue area) is shown for *E. coli* sample. The genome size, heterozygote ratio and repetitive content of unprocessed short reads can be read.

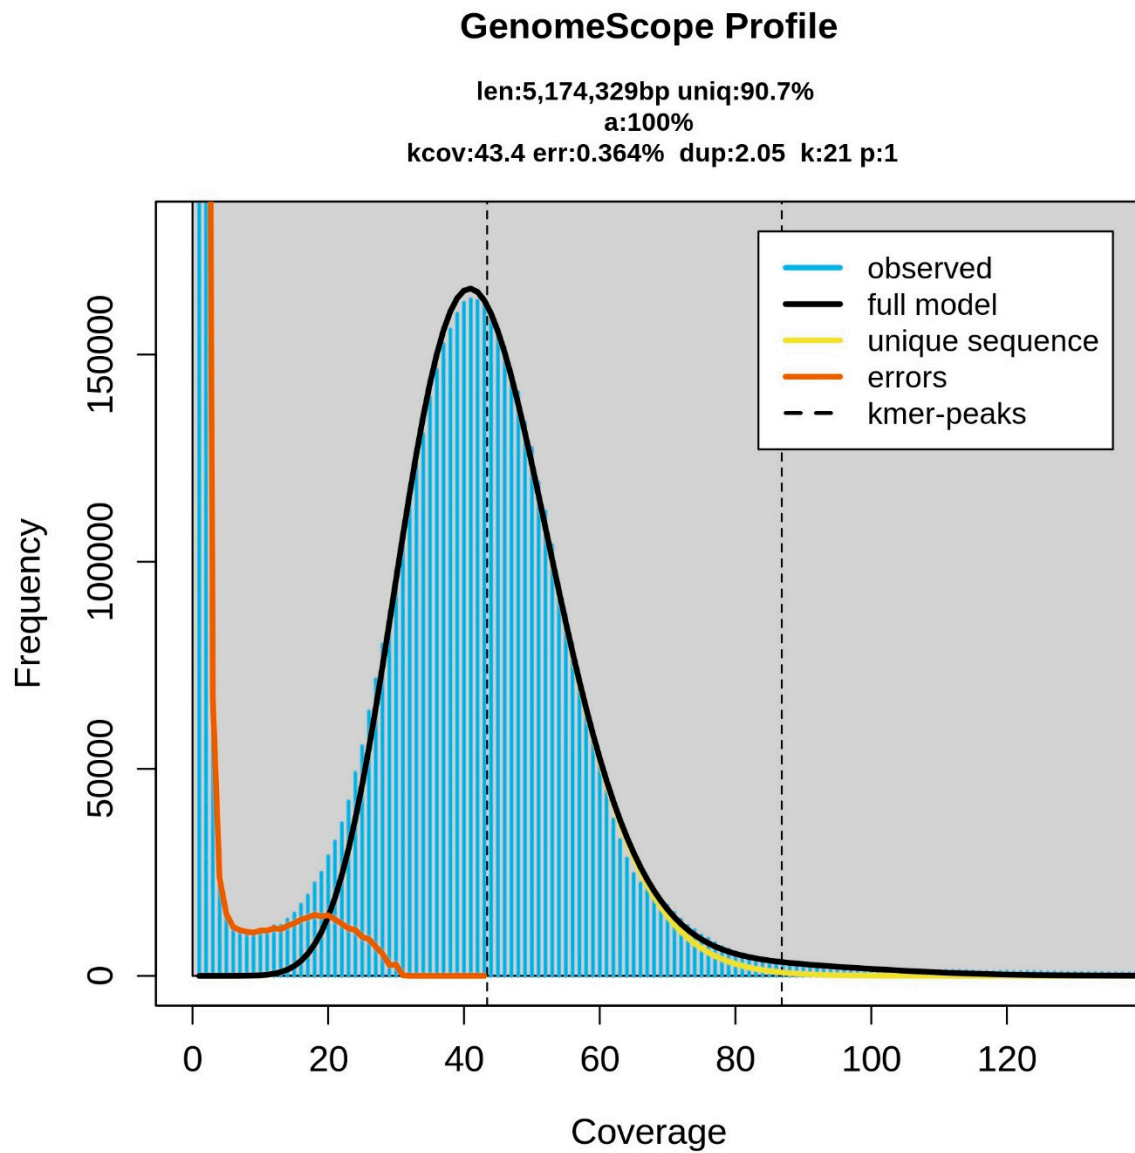

Supplementary Figure S6: GenoScope profile of 0× CTX sample. The fit of the model (black line) to the observed kmer frequencies (blue area) is shown for *E. coli* sample. The genome size, heterozygote ratio and repetitive content of unprocessed short reads can be read.



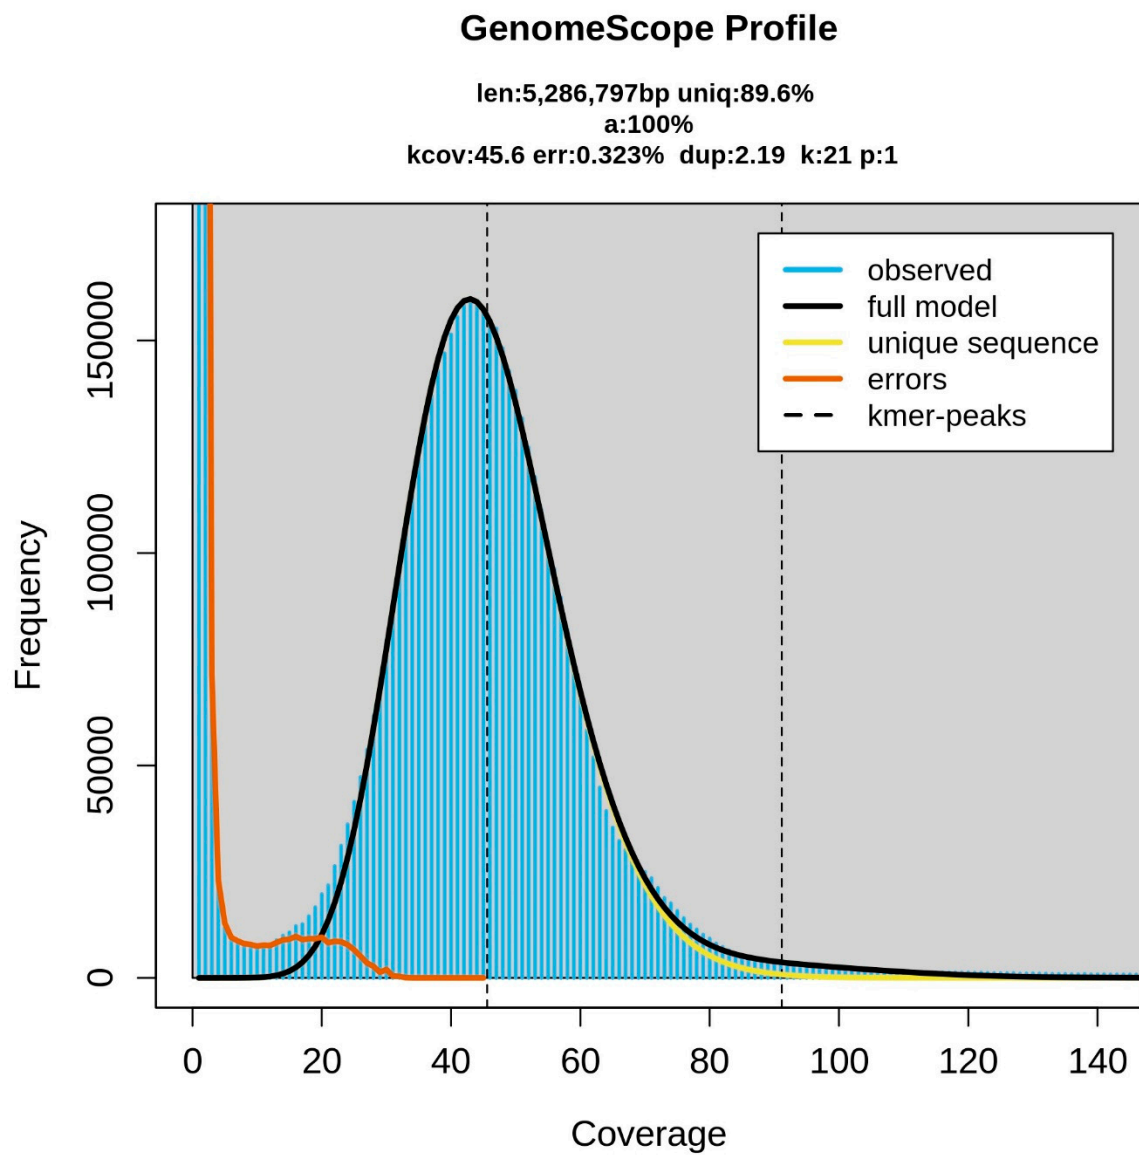

Supplementary Figure S7: GenoScope profile of 1× AMX sample. The fit of the model (black line) to the observed kmer frequencies (blue area) is shown for *E. coli* sample. The genome size, heterozygote ratio and repetitive content of unprocessed short reads can be read.

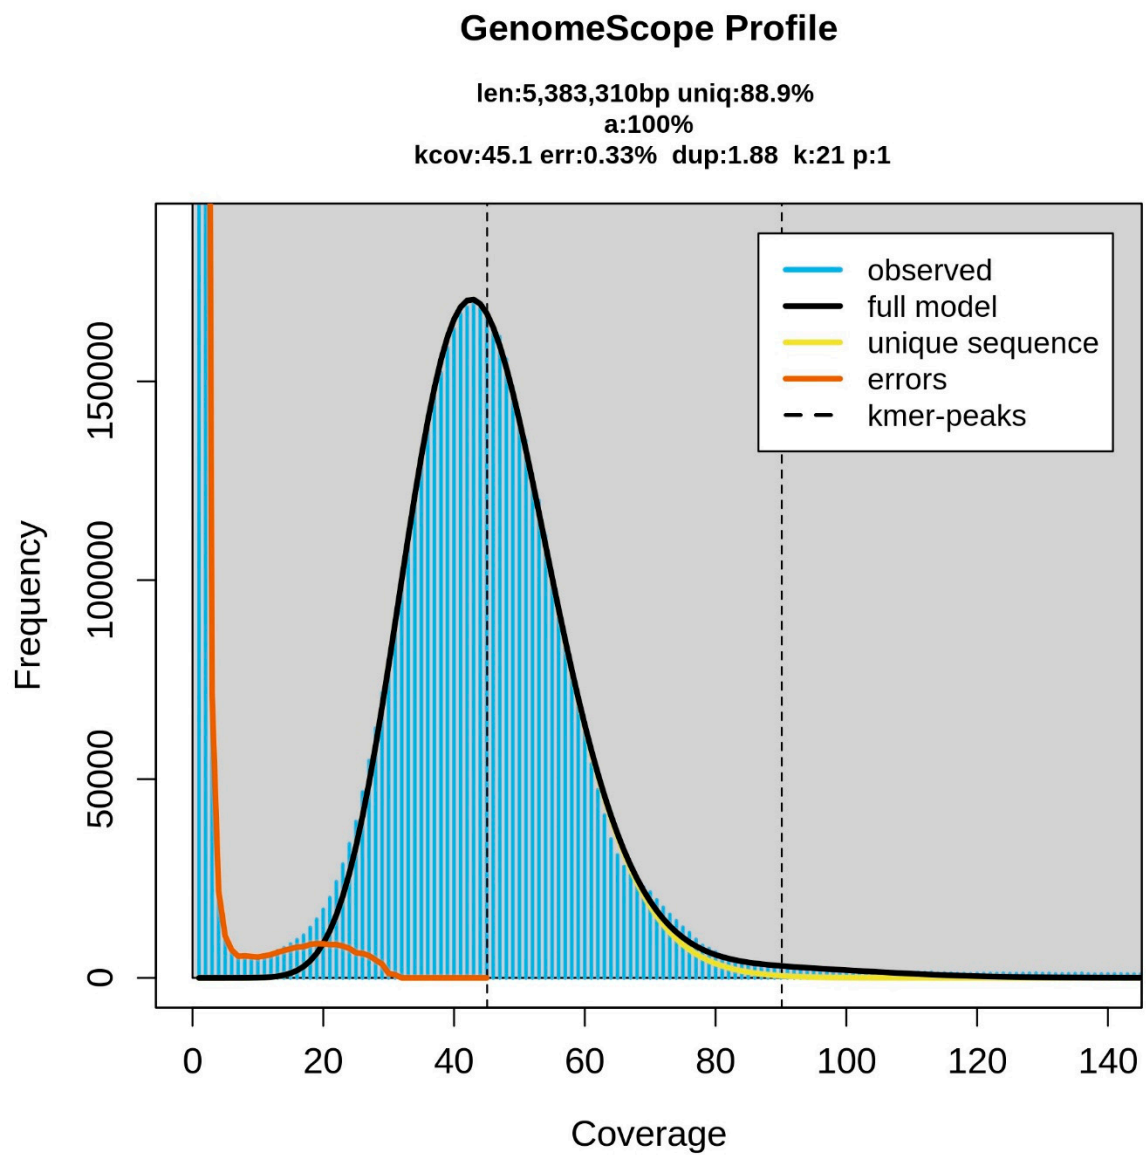

Supplementary Figure S8: GenoScope profile of 10× AMX sample. The fit of the model (black line) to the observed kmer frequencies (blue area) is shown for *E. coli* sample. The genome size, heterozygote ratio and repetitive content of unprocessed short reads can be read.

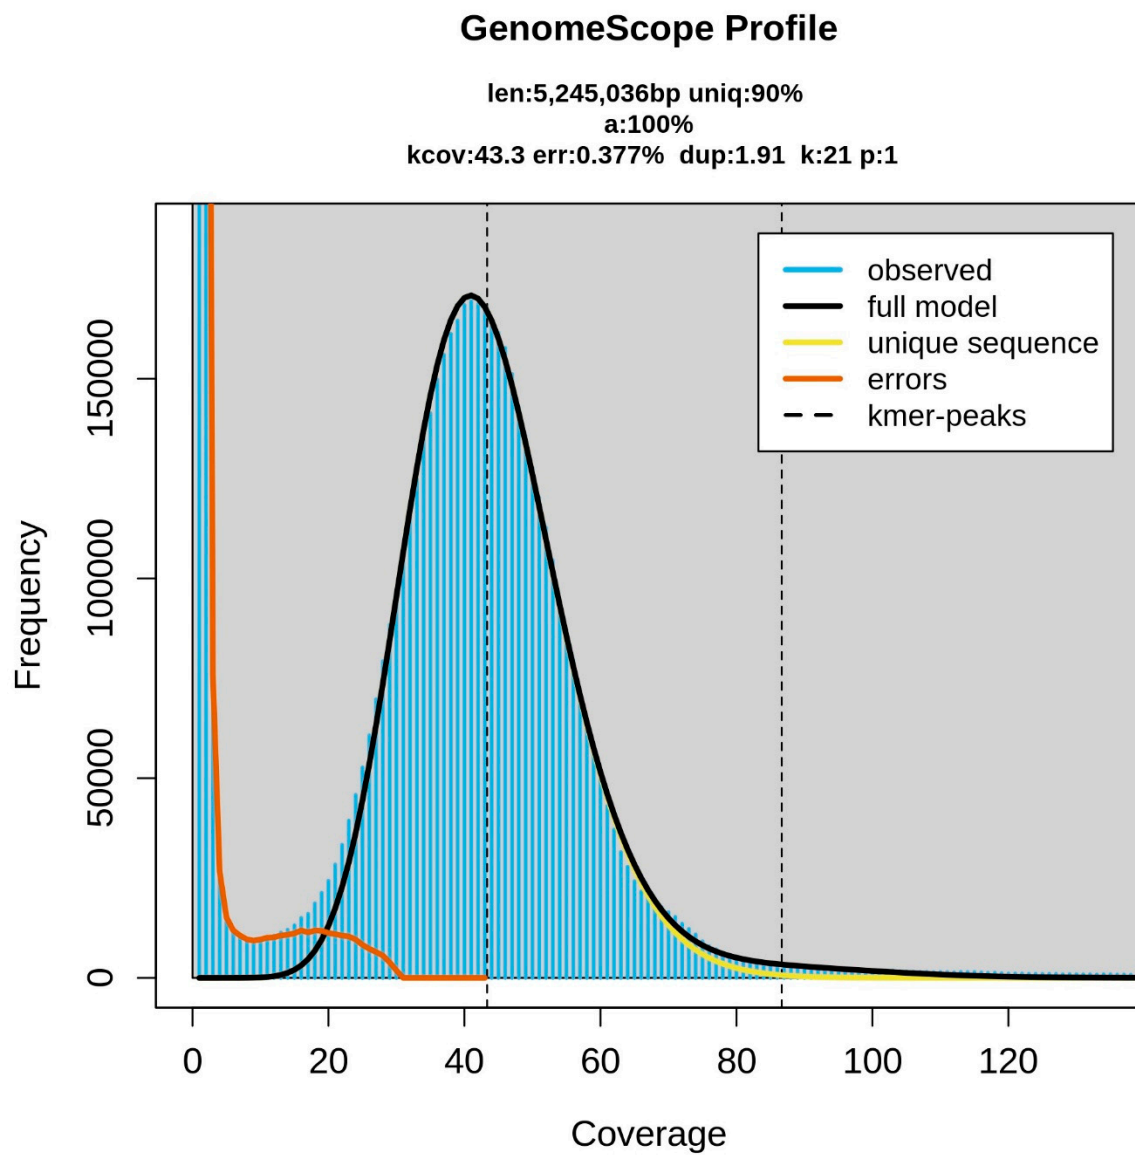

Supplementary Figure S9: GenoScope profile of 100× AMX sample. The fit of the model (black line) to the observed kmer frequencies (blue area) is shown for *E. coli* sample. The genome size, heterozygote ratio and repetitive content of unprocessed short reads can be read.

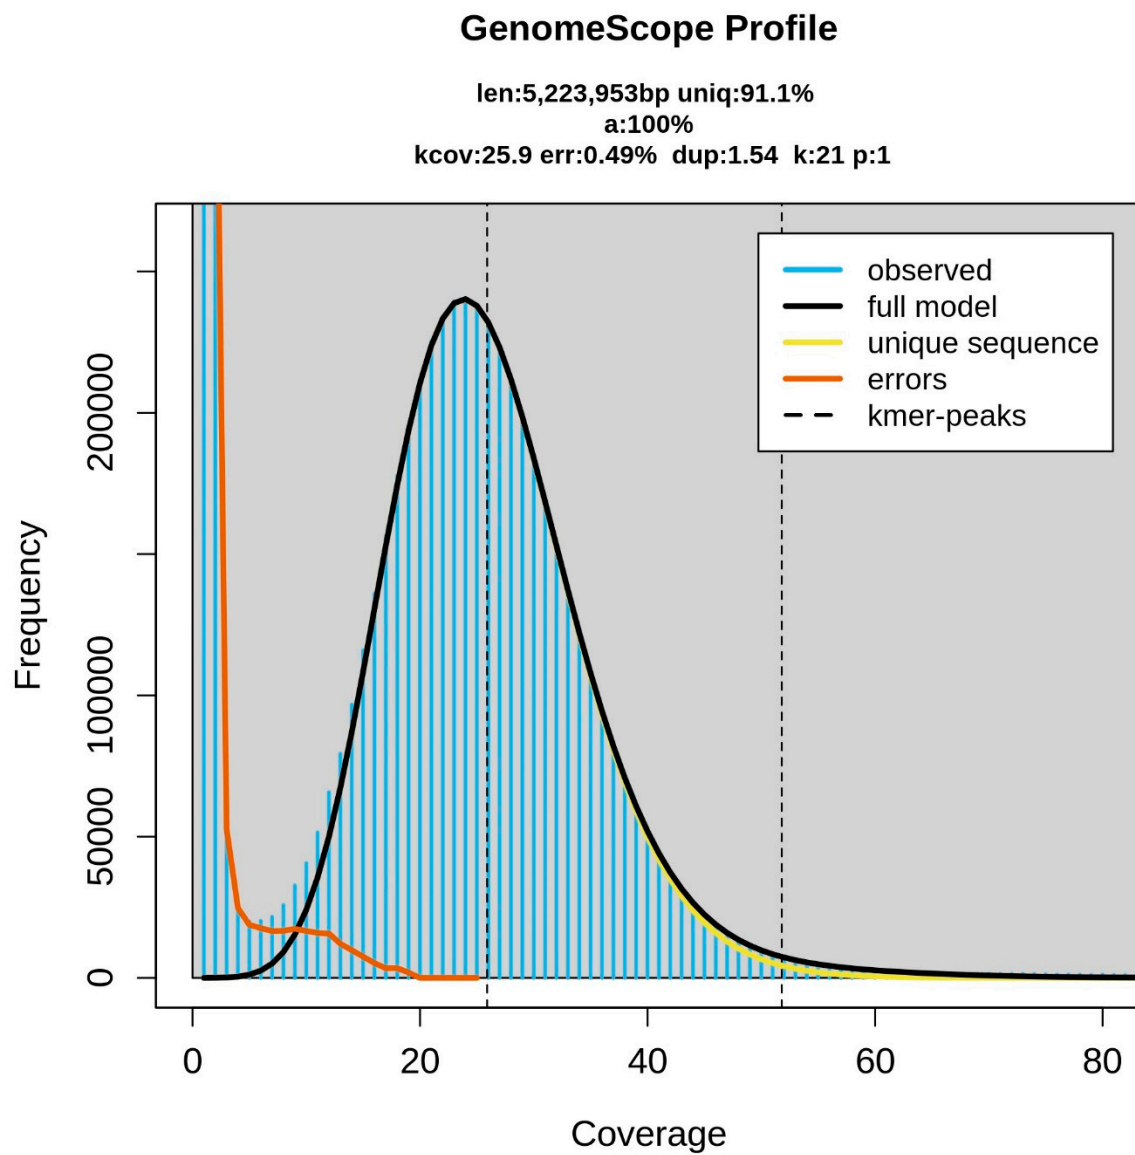

Supplementary Figure S10: GenoScope profile of 1000× AMX sample. The fit of the model (black line) to the observed kmer fre-quencies (blue area) is shown for *E. coli* sample. The genome size, heterozygote ratio and repetitive content of unprocessed short reads can be read.

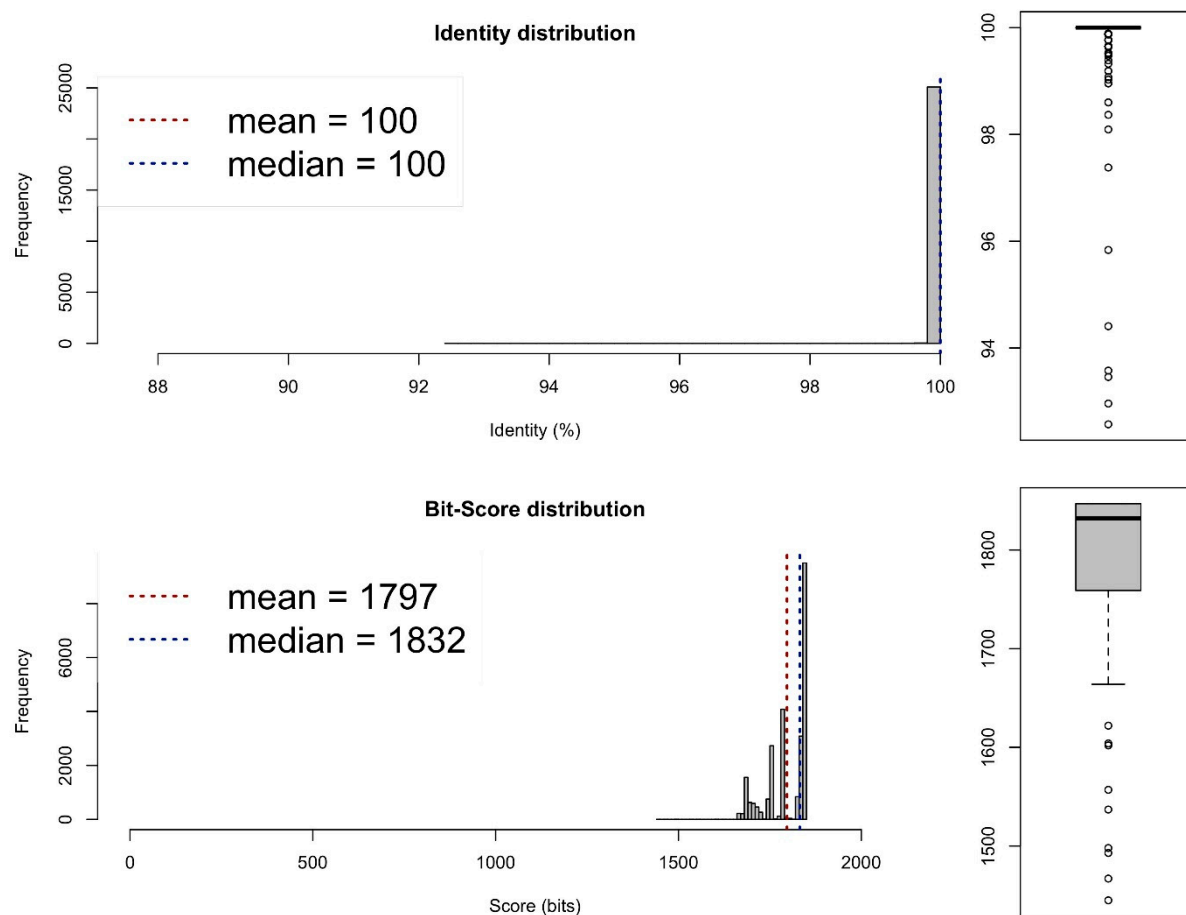

Supplementary Figure S11: The Average Nucleotide Identity (ANI) values between 0× and 1000× amoxicillin genomes of the same species are above 95%. One-way ANI 1: 99.99% (SD: 0.23%), from 25210 fragments. One-way ANI 2: 99.99% (SD: 0.15%), from 25203 fragments. Two-way ANI: 100.00% (SD: 0.10%), from 25145 fragments.

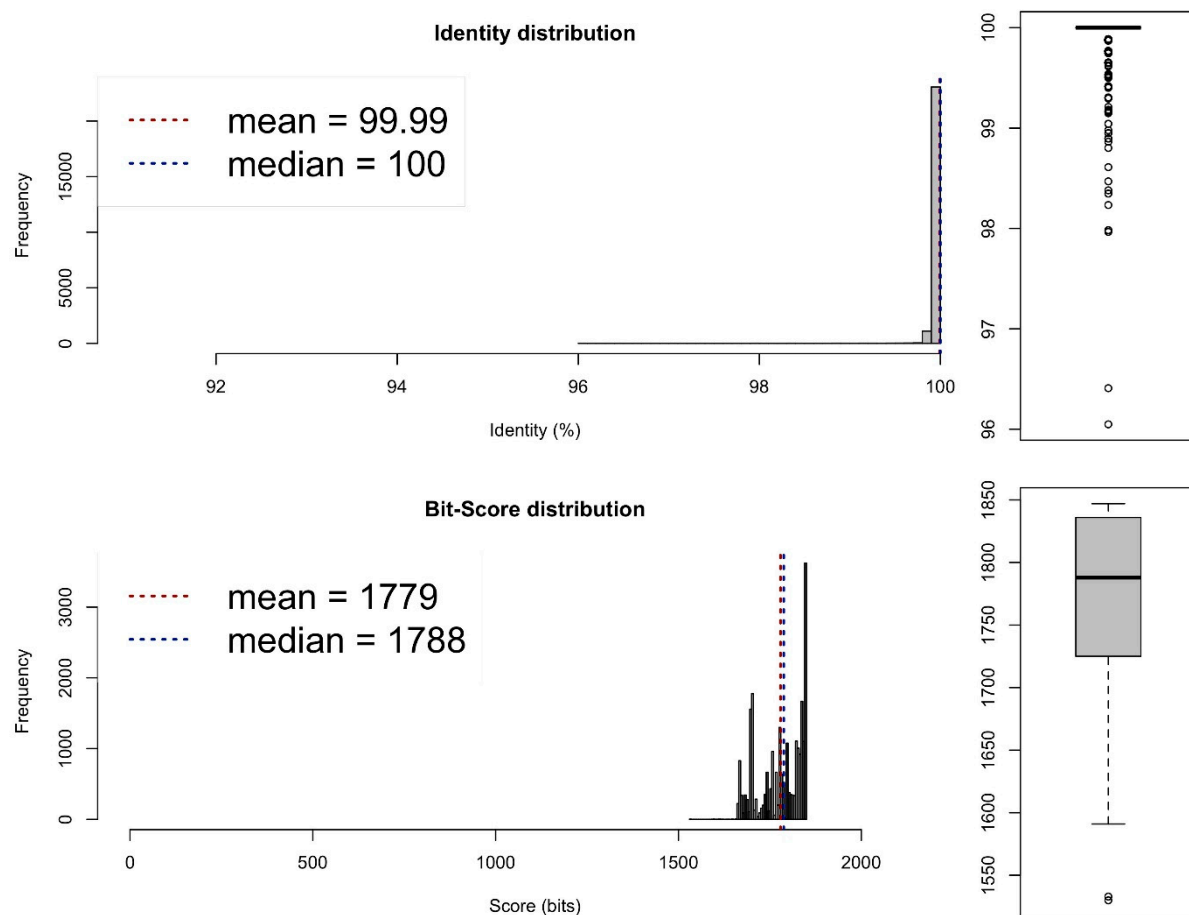

Supplementary Figure S12: The Average Nucleotide Identity (ANI) values between 0× and 1000× cefotaxime genomes of the same species are above 95%. One-way ANI 1: 99.99% (SD: 0.17%), from 24483 fragments. One-way ANI 2: 99.99% (SD: 0.07%), from 24366 fragments. Two-way ANI: 99.99% (SD: 0.07%), from 24307 fragments.
